# Supplementary material for: Severe desaturations increase psychomotor vigilance task-based median reaction time and number of lapses in obstructive sleep apnoea patients
Source: PubMed Central journal article supplement — Eur Respir J. 2020 Apr 9;55(4):1901849. doi: 10.1183/13993003.01849-2019 (PMC7142879; doi:10.1183/13993003.01849-2019), 2020-04-09
Supplement: ERJ-01849-2019.SUPPLEMENT.pdf [file ERJ-01849-2019.SUPPLEMENT.pdf]

## Supplementary material

**Table S1:** The odds of belonging to the worst-performing PVT quartile (Q4) when parameter values are increased by 10% compared to the combined group of all other quartiles (Q1-Q3). Quartiles and the corresponding odds are defined separately for each PVT outcome variable.

|                                                                                                     | RRT (1/ms)  | Median RT (ms) | Slowest 10% RT (ms) | Fastest 10% RT (ms) | Lapses (RT>500ms) |
|-----------------------------------------------------------------------------------------------------|-------------|----------------|---------------------|---------------------|-------------------|
| <i>Model adjusted for sex, age, BMI, ESS and comorbidities</i>                                      |             |                |                     |                     |                   |
| TST (h)                                                                                             | 1.02        | 1.06           | 1.01                | 1.00                | 1.02              |
| AHI (1/h)                                                                                           | 1.04        | 1.03           | 0.96                | 1.01                | 1.06              |
| ODI (1/h)                                                                                           | 1.07        | 1.07           | 0.98                | 1.06                | 1.09              |
| AI (1/h)                                                                                            | 0.98        | 0.97           | 0.96                | 0.94                | 1.01              |
| ObsDur (%)                                                                                          | 1.02        | 0.99           | 0.96                | 0.99                | 1.05              |
| DesDur (%)                                                                                          | 1.06        | 1.05           | 0.99                | 1.05                | 1.08              |
| DesSev (%)                                                                                          | 1.15        | <b>1.16</b>    | 1.03                | 1.07                | <b>1.18</b>       |
| ObsSev (s%)                                                                                         | 1.08        | 1.08           | 1.03                | 1.02                | 1.10              |
| Mean SpO <sub>2</sub> (%)                                                                           | 0.85        | 0.89           | 0.89                | 0.93                | 0.80              |
| Min. SpO <sub>2</sub> (%)                                                                           | 0.97        | 0.96           | 0.99                | 0.99                | 0.94              |
| t <sub>90%</sub> (s)                                                                                | 1.08        | 1.09           | 1.02                | 1.06                | <b>1.10</b>       |
| Mean Depth (%)                                                                                      | 1.15        | <b>1.18</b>    | 1.07                | 1.10                | <b>1.18</b>       |
| Median Depth (%)                                                                                    | <b>1.17</b> | <b>1.18</b>    | 1.08                | 1.11                | <b>1.20</b>       |
| <i>Model adjusted for sex, age, BMI, ESS, comorbidities, TST, AHI, AI, and Obstruction Duration</i> |             |                |                     |                     |                   |
| DesSev (%)                                                                                          | 1.24        | <b>1.29</b>    | 1.14                | 1.13                | <b>1.23</b>       |
| ObsSev (s%)                                                                                         | 1.14        | 1.17           | 1.13                | 1.05                | 1.13              |
| Mean SpO <sub>2</sub> (%)                                                                           | 0.85        | 0.88           | 0.83                | 0.95                | 0.85              |
| t <sub>90%</sub> (s)                                                                                | 1.07        | 1.07           | 1.03                | 1.00                | 1.08              |
| Mean Depth (%)                                                                                      | <b>1.20</b> | <b>1.26</b>    | 1.15                | 1.16                | <b>1.20</b>       |
| Median Depth (%)                                                                                    | <b>1.23</b> | <b>1.27</b>    | 1.16                | 1.18                | <b>1.23</b>       |

Caption: All odds are adjusted for smoking status and co-existence of hypertension, depression and chronic obstructive pulmonary disease (COPD). Bolded odds are statistically significant ( $p < 0.05$ ). Abbreviations: ms = milliseconds, TST = total sleep time, AHI = apnea-hypopnea index, ODI = oxygen desaturation index, AI = arousal index, ObsDur = obstruction duration, DesDur = desaturation duration, DesSev = desaturation severity, ObsSev = obstruction severity, t<sub>90%</sub> = time spent under 90% oxygenation, Mean Depth = mean depth of all desaturations, Median Depth = median depth of all desaturations.
